# Supplementary material for: Deep Sequencing Reveals Novel MicroRNAs and Regulation of MicroRNA Expression during Cell Senescence
Source: PLoS One. 2011 May 26;6(5):e20509. doi: 10.1371/journal.pone.0020509 (PMC3102725; doi:10.1371/journal.pone.0020509)
Supplement: Table S1 — Survey of miRDeep2 performance showing number of novel and known miRNAs and value of signal-to-noise ratio under different score cut-offs ranging from 10 to 1. (DOC) [file pone.0020509.s002.doc]

**Table S1**. Survey of miRDeep2 performance showing the number of novel and known miRNAs and value of signal-to-noise ratio under different score cut-offs ranging from 10 to 1.

|  | **Novel miRNAs** | | |  | **Known miRNAs** | | |  |
| --- | --- | --- | --- | --- | --- | --- | --- | --- |
| **miRDeep2 score1** | **Predicted2** | **False positives3** | **True positives4** |  | **In species5** | **In data6** | **Detected7** | **Signal-to-noise8** |
| 10 | 27 | 8 ± 3 | 19 ± 3 (72 ± 10%) |  | 1223 | 656 | 358 (55%) | 23.3 |
| 9 | 28 | 8 ± 3 | 20 ± 3 (72 ± 9%) |  | 1223 | 656 | 360 (55%) | 23 |
| 8 | 31 | 8 ± 3 | 23 ± 3 (74 ± 9%) |  | 1223 | 656 | 365 (56%) | 23 |
| 7 | 32 | 8 ± 3 | 24 ± 3 (75 ± 9%) |  | 1223 | 656 | 369 (56%) | 23 |
| 6 | 35 | 8 ± 3 | 27 ± 3 (76 ± 8%) |  | 1223 | 656 | 373 (57%) | 22.7 |
| 5 | 39 | 10 ± 3 | 29 ± 3 (75 ± 8%) |  | 1223 | 656 | 432 (66%) | 21.5 |
| 4 | 46 | 15 ± 4 | 31 ± 4 (66 ± 8%) |  | 1223 | 656 | 452 (69%) | 15.6 |
| 3 | 53 | 33 ± 5 | 20 ± 5 (37 ± 10%) |  | 1223 | 656 | 465 (71%) | 8.6 |
| 2 | 78 | 45 ± 6 | 33 ± 6 (43 ± 8%) |  | 1223 | 656 | 485 (74%) | 7.1 |
| 1 | 152 | 63 ± 7 | 89 ± 7 (59 ± 5%) |  | 1223 | 656 | 528 (80%) | 6 |

1The miRDeep2 score represents the log-odds probability of a sequence being genuine miRNA precursor versus the probability that it is a background hairpin, given the evidence from the data.

2Number of novel miRNA hairpins with a score ≥ cut-off.

3Number of false positive miRNA hairpins predicted at this cut-off, as estimated by the miRDeep2 controls. Mean and standard deviation are estimated from 100 rounds of permuted controls.

4Number of true positive miRNA hairpins is estimated as t = total novel miRNAs - false positive novel miRNAs. The percentage of the predicted novel miRNAs that is estimated to be true positives is calculated as p = t/total novel miRNAs. The number of false positives is estimated from 100 rounds of permuted controls. In each of the 100 rounds, t and p are calculated, generating mean and standard deviation of t and p. The variable p can be used as an estimation of miRDeep2 positive predictive value at the score cut-off.

5Number of reference mature miRNAs for the human species given as input to miRDeep2.

6Number of reference mature miRNAs that map perfectly to one or more of precursor candidates that have been excised from the genome by miRDeep2.

7Number of reference mature miRNAs that map perfectly to one or more of predicted miRNA hairpins that have a score equal to or exceeding the cut-off. The percentage of reference mature miRNAs in data that is detected by miRDeep2 is calculated as s = reference mature miRNAs detected/reference mature miRNAs in data. s can be used as an estimation of miRDeep2 sensitivity at the score cut-off.

8The signal-to-noise ratio for the given score cut-off is estimated as r = total miRNA hairpins reported / mean estimated false positive miRNA hairpins over 100 rounds of permuted controls.
